# Supplementary material
Source: PubMed Central journal article supplement (PMC548343)
Supplement: nar_33_2_725__1.pdf [file nar_33_2_725__1.pdf]

## Supplementary material

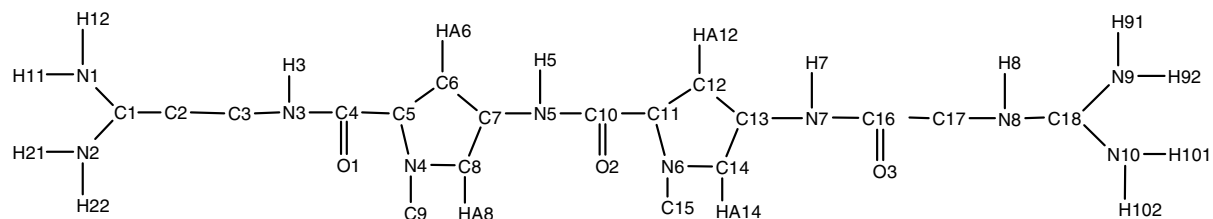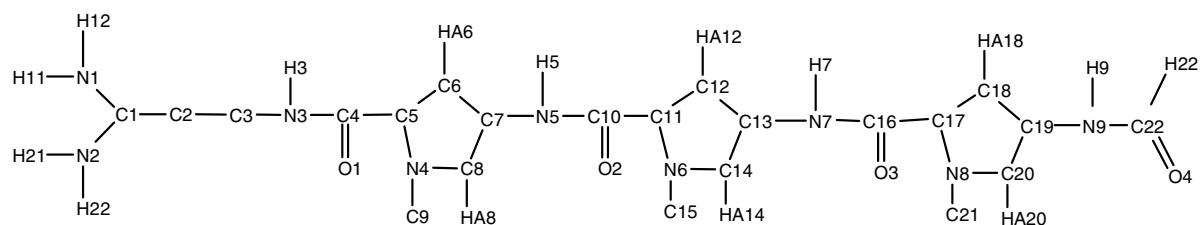

**Figure 1.** The atomic numbering scheme used in the force field parameter tables for netropsin (A) and distamycin (B).

## Netropsin 45A4 force field parameters

**Table 1.** Atom names, masses, van der Waals parameters and charges for Netropsin. Atom names according to Figure 1A. Charges in brackets are from the 45B4 force field.

| Atom name | Mass<br>(a.u.) | $C_6^{1/2}$<br>(kJ mol <sup>-1</sup> nm <sup>6</sup> ) <sup>1/2</sup> | $C_{12}^{1/2}$<br>10 <sup>-3</sup> (kJ mol <sup>-1</sup> nm <sup>12</sup> ) <sup>1/2</sup> | Charge<br>( <i>e</i> ) |         |
|-----------|----------------|-----------------------------------------------------------------------|--------------------------------------------------------------------------------------------|------------------------|---------|
| N1        | 14.0067        | 0.04936                                                               | 1.301 (2.148) <sup>a</sup>                                                                 | -0.26                  |         |
| H11       | 1.008          | 0.0                                                                   | 0.0                                                                                        | 0.28                   |         |
| H12       | 1.008          | 0.0                                                                   | 0.0                                                                                        | 0.28                   |         |
| N2        | 14.0067        | 0.04936                                                               | 1.301 (2.148) <sup>a</sup>                                                                 | -0.26                  |         |
| H21       | 1.008          | 0.0                                                                   | 0.0                                                                                        | 0.28                   |         |
| H22       | 1.008          | 0.0                                                                   | 0.0                                                                                        | 0.28                   |         |
| C1        | 12.011         | 0.04838                                                               | 1.837                                                                                      | 0.40                   |         |
| C2        | 14.027         | 0.08642 (0.06873) <sup>b</sup>                                        | 5.828 (2.178) <sup>b</sup>                                                                 | 0.00                   |         |
| C3        | 14.027         | 0.08642 (0.06873) <sup>b</sup>                                        | 5.828 (2.178) <sup>b</sup>                                                                 | 0.00                   |         |
| N3        | 14.0067        | 0.04936                                                               | 1.301 (1.943) <sup>a</sup>                                                                 | -0.28                  |         |
| H3        | 1.008          | 0.0                                                                   | 0.0                                                                                        | 0.28                   |         |
| C4        | 12.011         | 0.04838                                                               | 1.837                                                                                      | 0.38                   |         |
| O1        | 15.9994        | 0.04756                                                               | 0.8611 (1.125) <sup>a</sup>                                                                | -0.38                  |         |
| C5        | 12.011         | 0.04838                                                               | 1.837                                                                                      | 0.00                   |         |
| C6        | 12.011         | 0.04838                                                               | 1.837                                                                                      | -0.10                  |         |
| HA6       | 1.008          | 0.0092                                                                | 0.123                                                                                      | 0.10                   |         |
| C7        | 12.011         | 0.04838                                                               | 1.837                                                                                      | 0.00                   |         |
| C8        | 12.011         | 0.04838                                                               | 1.837                                                                                      | -0.10                  |         |
| HA8       | 1.008          | 0.0092                                                                | 0.123                                                                                      | 0.10                   |         |
| N4        | 14.0067        | 0.04936                                                               | 1.301 (1.841) <sup>a</sup>                                                                 | -0.20                  |         |
| C9        | 15.035         | 0.09805 (0.08278) <sup>b</sup>                                        | 5.162 (2.456) <sup>b</sup>                                                                 | 0.20                   |         |
| N5        | 14.0067        | 0.04936                                                               | 1.301 (1.943) <sup>a</sup>                                                                 | -0.28                  |         |
| H5        | 1.008          | 0.0                                                                   | 0.0                                                                                        | 0.28                   |         |
| C10       | 12.011         | 0.04838                                                               | 1.837                                                                                      | 0.38                   |         |
| O2        | 15.9994        | 0.04756                                                               | 0.8611 (1.125) <sup>a</sup>                                                                | -0.38                  |         |
| C11       | 12.011         | 0.04838                                                               | 1.837                                                                                      | 0.00                   |         |
| C12       | 12.011         | 0.04838                                                               | 1.837                                                                                      | -0.10                  |         |
| HA12      | 1.008          | 0.0092                                                                | 0.123                                                                                      | 0.10                   |         |
| C13       | 12.011         | 0.04838                                                               | 1.837                                                                                      | 0.00                   |         |
| C14       | 12.011         | 0.04838                                                               | 1.837                                                                                      | -0.10                  |         |
| HA14      | 1.008          | 0.0092                                                                | 0.123                                                                                      | 0.10                   |         |
| N6        | 14.0067        | 0.04936                                                               | 1.301 (1.841) <sup>a</sup>                                                                 | -0.20                  |         |
| C15       | 15.035         | 0.09805 (0.08278) <sup>b</sup>                                        | 5.162 (2.456) <sup>b</sup>                                                                 | 0.20                   |         |
| N7        | 14.0067        | 0.04936                                                               | 1.301 (1.943) <sup>a</sup>                                                                 | -0.28                  |         |
| H7        | 1.008          | 0.0                                                                   | 0.0                                                                                        | 0.28                   |         |
| C16       | 12.011         | 0.04838                                                               | 1.837                                                                                      | 0.38                   |         |
| O3        | 15.9994        | 0.04756                                                               | 0.8611 (1.125) <sup>a</sup>                                                                | -0.38                  |         |
| C17       | 14.027         | 0.08642 (0.06873) <sup>b</sup>                                        | 5.828 (2.178) <sup>b</sup>                                                                 | 0.09                   | (0.00)  |
| N8        | 14.0067        | 0.04936                                                               | 1.301 (1.984) <sup>a</sup>                                                                 | -0.11                  | (-0.24) |
| H8        | 1.008          | 0.0                                                                   | 0.0                                                                                        | 0.24                   | (0.24)  |
| C18       | 12.011         | 0.04838                                                               | 1.837                                                                                      | 0.34                   | (0.00)  |
| N9        | 14.0067        | 0.04936                                                               | 1.301 (2.148) <sup>a</sup>                                                                 | -0.26                  | (-0.48) |
| H91       | 1.008          | 0.0                                                                   | 0.0                                                                                        | 0.24                   | (0.24)  |
| H92       | 1.008          | 0.0                                                                   | 0.0                                                                                        | 0.24                   | (0.24)  |
| N10       | 14.0067        | 0.04936                                                               | 1.301 (2.148) <sup>a</sup>                                                                 | -0.26                  | (-0.48) |
| H101      | 1.008          | 0.0                                                                   | 0.0                                                                                        | 0.24                   | (0.24)  |
| H102      | 1.008          | 0.0                                                                   | 0.0                                                                                        | 0.24                   | (0.24)  |

a) In brackets, the value for  $C_{12}(II)^{1/2}$  is given which is to be used in polar interactions. b) In brackets, the van der Waals parameters are given to be used in 1,4-interactions.

**Table 2.** Bond parameters for Netropsin. Atom names according to Figure 1A.

| Bond   | Force constant<br>$K_{b_n}$ ( $10^6$ kJmol <sup>-1</sup> nm <sup>-4</sup> ) | Ideal bond<br>length<br>$b_{0n}$ (nm) | Bond     | Force constant<br>$K_{b_n}$ ( $10^6$ kJmol <sup>-1</sup> nm <sup>-4</sup> ) | Ideal bond<br>length<br>$b_{0n}$ (nm) |
|--------|-----------------------------------------------------------------------------|---------------------------------------|----------|-----------------------------------------------------------------------------|---------------------------------------|
| N1-H11 | 18.7                                                                        | 0.100                                 | C10-O2   | 16.6                                                                        | 0.123                                 |
| N1-H12 | 18.7                                                                        | 0.100                                 | C10-C11  | 7.15                                                                        | 0.153                                 |
| N2-H21 | 18.7                                                                        | 0.100                                 | C11-C12  | 11.8                                                                        | 0.133                                 |
| N2-H22 | 18.7                                                                        | 0.100                                 | C12-HA12 | 12.3                                                                        | 0.109                                 |
| N1-C1  | 10.5                                                                        | 0.134                                 | C12-C13  | 11.8                                                                        | 0.133                                 |
| N2-C1  | 10.5                                                                        | 0.134                                 | C13-C14  | 11.8                                                                        | 0.133                                 |
| C1-C2  | 7.15                                                                        | 0.153                                 | C14-HA14 | 12.3                                                                        | 0.109                                 |
| C2-C3  | 7.15                                                                        | 0.153                                 | C14-N6   | 11.8                                                                        | 0.133                                 |
| C3-N3  | 8.71                                                                        | 0.147                                 | N6-C15   | 5.73                                                                        | 0.148                                 |
| N3-H3  | 18.7                                                                        | 0.100                                 | N6-C11   | 11.8                                                                        | 0.133                                 |
| N3-C4  | 11.8                                                                        | 0.133                                 | C13-N7   | 8.71                                                                        | 0.147                                 |
| C4-O1  | 16.6                                                                        | 0.123                                 | N7-H7    | 18.7                                                                        | 0.100                                 |
| C4-C5  | 7.15                                                                        | 0.153                                 | N7-C16   | 11.8                                                                        | 0.133                                 |
| C5-C6  | 11.8                                                                        | 0.133                                 | C16-O3   | 16.6                                                                        | 0.123                                 |
| C6-HA6 | 12.3                                                                        | 0.109                                 | C16-C17  | 7.15                                                                        | 0.153                                 |
| C6-C7  | 11.8                                                                        | 0.133                                 | C17-N8   | 8.71                                                                        | 0.147                                 |
| C7-C8  | 11.8                                                                        | 0.133                                 | N8-H8    | 18.7                                                                        | 0.100                                 |
| C8-HA8 | 12.3                                                                        | 0.109                                 | N8-C18   | 10.5                                                                        | 0.134                                 |
| C8-N4  | 11.8                                                                        | 0.133                                 | C18-N9   | 10.5                                                                        | 0.134                                 |
| N4-C9  | 5.73                                                                        | 0.148                                 | N9-H91   | 18.7                                                                        | 0.100                                 |
| N4-C5  | 11.8                                                                        | 0.133                                 | N9-H92   | 18.7                                                                        | 0.100                                 |
| C7-N5  | 8.71                                                                        | 0.147                                 | C18-N10  | 10.5                                                                        | 0.134                                 |
| N5-H5  | 18.7                                                                        | 0.100                                 | N10-H101 | 18.7                                                                        | 0.100                                 |
| N5-C10 | 11.8                                                                        | 0.133                                 | N10-H102 | 18.7                                                                        | 0.100                                 |

**Table 3.** Bond-angle parameters for Netropsin. Atom names according to Figure 1A.

| Bond angle | Force constant<br>$K_{\theta_n}$ (kJmol <sup>-1</sup> ) | Ideal bond angle<br>$\theta_{0_n}$ (degree) | Bond angle    | Force constant<br>$K_{\theta_n}$ (kJmol <sup>-1</sup> ) | Ideal bond angle<br>$\theta_{0_n}$ (degree) |
|------------|---------------------------------------------------------|---------------------------------------------|---------------|---------------------------------------------------------|---------------------------------------------|
| H11-N1-H12 | 445                                                     | 120.0                                       | O2-C10-C11    | 685                                                     | 121.0                                       |
| H21-N2-H22 | 445                                                     | 120.0                                       | N5-C10-C11    | 610                                                     | 115.0                                       |
| C1-N1-H11  | 390                                                     | 120.0                                       | C10-C11-C12   | 640                                                     | 126.0                                       |
| C1-N1-H12  | 390                                                     | 120.0                                       | N6-C11-C12    | 465                                                     | 108.0                                       |
| C1-N2-H21  | 390                                                     | 120.0                                       | N6-C11-C10    | 640                                                     | 126.0                                       |
| C1-N2-H22  | 390                                                     | 120.0                                       | C11-C12-HA12  | 575                                                     | 126.0                                       |
| N1-C1-N2   | 670                                                     | 120.0                                       | HA12-C12-C13  | 575                                                     | 126.0                                       |
| N1-C1-C2   | 670                                                     | 120.0                                       | C11-C12-C13   | 465                                                     | 108.0                                       |
| N2-C1-C2   | 670                                                     | 120.0                                       | C12-C13-C14   | 465                                                     | 108.0                                       |
| C1-C2-C3   | 530                                                     | 111.0                                       | C12-C13-N7    | 640                                                     | 126.0                                       |
| C2-C3-N3   | 530                                                     | 111.0                                       | C14-C13-N7    | 640                                                     | 126.0                                       |
| C3-N3-H3   | 460                                                     | 115.0                                       | C13-C14-HA14  | 575                                                     | 126.0                                       |
| H3-N3-C4   | 415                                                     | 123.0                                       | HA14-C14-N6   | 575                                                     | 126.0                                       |
| C3-N3-C4   | 700                                                     | 122.0                                       | C13-C14-N6    | 465                                                     | 108.0                                       |
| N3-C4-O1   | 730                                                     | 124.0                                       | C14-N6-C15    | 640                                                     | 126.0                                       |
| O1-C4-C5   | 685                                                     | 121.0                                       | C15-N6-C11    | 640                                                     | 126.0                                       |
| N3-C4-C5   | 610                                                     | 115.0                                       | C14-N6-C11    | 465                                                     | 108.0                                       |
| C4-C5-C6   | 640                                                     | 126.0                                       | C13-N7-H7     | 460                                                     | 115.0                                       |
| C6-C5-N4   | 465                                                     | 108.0                                       | H7-N7-C16     | 415                                                     | 123.0                                       |
| N4-C5-C4   | 640                                                     | 126.0                                       | C13-N7-C16    | 700                                                     | 122.0                                       |
| C5-C6-HA6  | 575                                                     | 126.0                                       | N7-C16-O3     | 730                                                     | 124.0                                       |
| C5-C6-C7   | 465                                                     | 108.0                                       | O3-C16-C17    | 685                                                     | 121.0                                       |
| HA6-C6-C7  | 575                                                     | 126.0                                       | N7-C16-C17    | 610                                                     | 115.0                                       |
| C6-C7-C8   | 465                                                     | 108.0                                       | C16-C17-N8    | 520                                                     | 109.5                                       |
| C6-C7-N5   | 640                                                     | 126.0                                       | C17-N8-H8     | 465                                                     | 116.0                                       |
| C8-C7-N5   | 640                                                     | 126.0                                       | H8-N8-C18     | 390                                                     | 120.0                                       |
| C7-C8-HA8  | 575                                                     | 126.0                                       | C17-N8-C18    | 730                                                     | 124.0                                       |
| HA8-C8-N4  | 575                                                     | 126.0                                       | N8-C18-N9     | 670                                                     | 120.0                                       |
| C7-C8-N4   | 465                                                     | 108.0                                       | N8-C18-N10    | 670                                                     | 120.0                                       |
| C8-N4-C9   | 640                                                     | 126.0                                       | N9-C18-N10    | 670                                                     | 120.0                                       |
| C9-N4-C5   | 640                                                     | 126.0                                       | H91-N9-H92    | 445                                                     | 120.0                                       |
| C8-N4-C5   | 465                                                     | 108.0                                       | C18-N9-H91    | 390                                                     | 120.0                                       |
| C7-N5-H5   | 460                                                     | 115.0                                       | C18-N9-H92    | 390                                                     | 120.0                                       |
| H5-N5-C10  | 415                                                     | 123.0                                       | C18-N10-H101  | 390                                                     | 120.0                                       |
| C7-N5-C10  | 700                                                     | 122.0                                       | C18-N10-H102  | 390                                                     | 120.0                                       |
| N5-C10-O2  | 730                                                     | 124.0                                       | H101-N10-H102 | 445                                                     | 120.0                                       |

**Table 4.** Improper dihedral-angle parameters for Netropsin. Atom names according to Figure 1A.

| Improper dihedral angle | Force constant<br>$K_{\xi_n}$<br>(kJmol <sup>-1</sup> degree <sup>-2</sup> ) | Ideal improper<br>dihedral angle<br>$\xi_{0_n}$ (degree) |
|-------------------------|------------------------------------------------------------------------------|----------------------------------------------------------|
| N1-H11-H12-C1           | 0.0510                                                                       | 0.0                                                      |
| N2-H21-H22-C1           | 0.0510                                                                       | 0.0                                                      |
| C1-N1-N2-C2             | 0.0510                                                                       | 0.0                                                      |
| N3-C3-H3-C4             | 0.0510                                                                       | 0.0                                                      |
| C4-N3-O1-C5             | 0.0510                                                                       | 0.0                                                      |
| C5-C4-C6-N4             | 0.0510                                                                       | 0.0                                                      |
| C6-C5-HA6-C7            | 0.0510                                                                       | 0.0                                                      |
| C7-C6-C8-N5             | 0.0510                                                                       | 0.0                                                      |
| C8-C7-HA8-N4            | 0.0510                                                                       | 0.0                                                      |
| N4-C5-C8-C9             | 0.0510                                                                       | 0.0                                                      |
| C5-C6-C7-C8             | 0.0510                                                                       | 0.0                                                      |
| C6-C7-C8-N4             | 0.0510                                                                       | 0.0                                                      |
| C7-C8-N4-C5             | 0.0510                                                                       | 0.0                                                      |
| C8-N4-C5-C6             | 0.0510                                                                       | 0.0                                                      |
| N4-C5-C6-C7             | 0.0510                                                                       | 0.0                                                      |
| N5-C7-H5-C10            | 0.0510                                                                       | 0.0                                                      |
| C10-N5-O2-C11           | 0.0510                                                                       | 0.0                                                      |
| C11-C10-C12-N6          | 0.0510                                                                       | 0.0                                                      |
| C12-C11-HA12-C13        | 0.0510                                                                       | 0.0                                                      |
| C13-C12-C14-N7          | 0.0510                                                                       | 0.0                                                      |
| C14-C13-HA14-N6         | 0.0510                                                                       | 0.0                                                      |
| N6-C11-C14-C15          | 0.0510                                                                       | 0.0                                                      |
| C11-C12-C13-C14         | 0.0510                                                                       | 0.0                                                      |
| C12-C13-C14-N6          | 0.0510                                                                       | 0.0                                                      |
| C13-C14-N6-C11          | 0.0510                                                                       | 0.0                                                      |
| C14-N6-C11-C12          | 0.0510                                                                       | 0.0                                                      |
| N6-C11-C12-C13          | 0.0510                                                                       | 0.0                                                      |
| N7-C13-H7-C16           | 0.0510                                                                       | 0.0                                                      |
| C16-N7-O3-C17           | 0.0510                                                                       | 0.0                                                      |
| N8-C17-H8-C18           | 0.0510                                                                       | 0.0                                                      |
| C18-N8-N9-N10           | 0.0510                                                                       | 0.0                                                      |
| N9-C18-H91-H92          | 0.0510                                                                       | 0.0                                                      |
| N10-C18-H101-H102       | 0.0510                                                                       | 0.0                                                      |

**Table 5.** Dihedral-angle parameters for Netropsin. Atom names according to Figure 1A.

| Dihedral angle  | Force constant<br>$K_{\varphi_n}$ (kJmol <sup>-1</sup> ) | Phase shift<br>cos ( $\delta_n$ ) | Multiplicity<br>$m_n$ |
|-----------------|----------------------------------------------------------|-----------------------------------|-----------------------|
| H11-N1-C1-C2    | 33.5                                                     | -1.0                              | 2                     |
| H21-N2-C1-C2    | 33.5                                                     | -1.0                              | 2                     |
| N1-C1-C2-C3     | 1.0                                                      | +1.0                              | 6                     |
| C1-C2-C3-N3     | 5.92                                                     | +1.0                              | 3                     |
| C2-C3-N3-C4     | 1.0                                                      | -1.0                              | 6                     |
| C3-N3-C4-C5     | 33.5                                                     | -1.0                              | 2                     |
| N3-C4-C5-C6     | 33.5                                                     | -1.0                              | 2                     |
| C6-C7-N5-C10    | 33.5                                                     | -1.0                              | 2                     |
| C7-N5-C10-C11   | 33.5                                                     | -1.0                              | 2                     |
| N5-C10-C11-C12  | 33.5                                                     | -1.0                              | 2                     |
| C12-C13-N7-C16  | 33.5                                                     | -1.0                              | 2                     |
| C13-N7-C16-C17  | 33.5                                                     | -1.0                              | 2                     |
| N7-C16-C17-N8   | 1.0                                                      | +1.0                              | 6                     |
| C16-C17-N8-C18  | 1.0                                                      | -1.0                              | 6                     |
| C17-N8-C18-N9   | 33.5                                                     | -1.0                              | 2                     |
| N8-C18-N9-H91   | 33.5                                                     | -1.0                              | 2                     |
| N8-C18-N10-H101 | 33.5                                                     | -1.0                              | 2                     |

## Distamycin 45A4 force field parameters

**Table 6.** Atom names, masses, van der Waals parameters and charges for Distamycin. Atom names according to Figure 1B.

| Atom name | Mass<br>(a.u.) | $C_6^{1/2}$<br>(kJ mol <sup>-1</sup> nm <sup>-6</sup> ) <sup>1/2</sup> | $C_{12}^{1/2}$<br>10 <sup>-3</sup> (kJ mol <sup>-1</sup> nm <sup>-12</sup> ) <sup>1/2</sup> | Charge<br>( <i>e</i> ) |
|-----------|----------------|------------------------------------------------------------------------|---------------------------------------------------------------------------------------------|------------------------|
| N1        | 14.0067        | 0.04936                                                                | 1.301 (2.148) <sup>a</sup>                                                                  | -0.26                  |
| H11       | 1.008          | 0.0                                                                    | 0.0                                                                                         | 0.28                   |
| H12       | 1.008          | 0.0                                                                    | 0.0                                                                                         | 0.28                   |
| N2        | 14.0067        | 0.04936                                                                | 1.301 (2.148) <sup>a</sup>                                                                  | -0.26                  |
| H21       | 1.008          | 0.0                                                                    | 0.0                                                                                         | 0.28                   |
| H22       | 1.008          | 0.0                                                                    | 0.0                                                                                         | 0.28                   |
| C1        | 12.011         | 0.04838                                                                | 1.837                                                                                       | 0.40                   |
| C2        | 14.027         | 0.08642 (0.06873) <sup>b</sup>                                         | 5.828 (2.178) <sup>b</sup>                                                                  | 0.00                   |
| C3        | 14.027         | 0.08642 (0.06873) <sup>b</sup>                                         | 5.828 (2.178) <sup>b</sup>                                                                  | 0.00                   |
| N3        | 14.0067        | 0.04936                                                                | 1.301 (1.943) <sup>a</sup>                                                                  | -0.28                  |
| H3        | 1.008          | 0.0                                                                    | 0.0                                                                                         | 0.28                   |
| C4        | 12.011         | 0.04838                                                                | 1.837                                                                                       | 0.38                   |
| O1        | 15.9994        | 0.04756                                                                | 0.8611 (1.125) <sup>a</sup>                                                                 | -0.38                  |
| C5        | 12.011         | 0.04838                                                                | 1.837                                                                                       | 0.00                   |
| C6        | 12.011         | 0.04838                                                                | 1.837                                                                                       | -0.10                  |
| HA6       | 1.008          | 0.0092                                                                 | 0.123                                                                                       | 0.10                   |
| C7        | 12.011         | 0.04838                                                                | 1.837                                                                                       | 0.00                   |
| C8        | 12.011         | 0.04838                                                                | 1.837                                                                                       | -0.10                  |
| HA8       | 1.008          | 0.0092                                                                 | 0.123                                                                                       | 0.10                   |
| N4        | 14.0067        | 0.04936                                                                | 1.301 (1.841) <sup>a</sup>                                                                  | -0.20                  |
| C9        | 15.035         | 0.09805 (0.08278) <sup>b</sup>                                         | 5.162 (2.456) <sup>b</sup>                                                                  | 0.20                   |
| N5        | 14.0067        | 0.04936                                                                | 1.301 (1.943) <sup>a</sup>                                                                  | -0.28                  |
| H5        | 1.008          | 0.0                                                                    | 0.0                                                                                         | 0.28                   |
| C10       | 12.011         | 0.04838                                                                | 1.837                                                                                       | 0.38                   |
| O2        | 15.9994        | 0.04756                                                                | 0.8611 (1.125) <sup>a</sup>                                                                 | -0.38                  |
| C11       | 12.011         | 0.04838                                                                | 1.837                                                                                       | 0.00                   |
| C12       | 12.011         | 0.04838                                                                | 1.837                                                                                       | -0.10                  |
| HA12      | 1.008          | 0.0092                                                                 | 0.123                                                                                       | 0.10                   |
| C13       | 12.011         | 0.04838                                                                | 1.837                                                                                       | 0.00                   |
| C14       | 12.011         | 0.04838                                                                | 1.837                                                                                       | -0.10                  |
| HA14      | 1.008          | 0.0092                                                                 | 0.123                                                                                       | 0.10                   |
| N6        | 14.0067        | 0.04936                                                                | 1.301 (1.841) <sup>a</sup>                                                                  | -0.20                  |
| C15       | 15.035         | 0.09805 (0.08278) <sup>b</sup>                                         | 5.162 (2.456) <sup>b</sup>                                                                  | 0.20                   |
| N7        | 14.0067        | 0.04936                                                                | 1.301 (1.943) <sup>a</sup>                                                                  | -0.28                  |
| H7        | 1.008          | 0.0                                                                    | 0.0                                                                                         | 0.28                   |
| C16       | 12.011         | 0.04838                                                                | 1.837                                                                                       | 0.38                   |
| O3        | 15.9994        | 0.04756                                                                | 0.8611 (1.125) <sup>a</sup>                                                                 | -0.38                  |
| C17       | 12.011         | 0.04838                                                                | 1.837                                                                                       | 0.00                   |
| C18       | 12.011         | 0.04838                                                                | 1.837                                                                                       | -0.10                  |
| HA18      | 1.008          | 0.0092                                                                 | 0.123                                                                                       | 0.10                   |
| C19       | 12.011         | 0.04838                                                                | 1.837                                                                                       | 0.00                   |
| C20       | 12.011         | 0.04838                                                                | 1.837                                                                                       | -0.10                  |
| HA20      | 1.008          | 0.0092                                                                 | 0.123                                                                                       | 0.10                   |
| N8        | 14.0067        | 0.04936                                                                | 1.301 (1.841) <sup>a</sup>                                                                  | -0.20                  |
| C21       | 15.035         | 0.09805 (0.08278) <sup>b</sup>                                         | 5.162 (2.456) <sup>b</sup>                                                                  | 0.20                   |
| N9        | 14.0067        | 0.04936                                                                | 1.301 (1.943) <sup>a</sup>                                                                  | -0.28                  |
| H9        | 1.008          | 0.0                                                                    | 0.0                                                                                         | 0.28                   |
| C22       | 12.011         | 0.04838                                                                | 1.837                                                                                       | 0.28                   |
| H22       | 1.008          | 0.0092                                                                 | 0.123                                                                                       | 0.10                   |
| O4        | 15.9994        | 0.04756                                                                | 0.8611 (1.125) <sup>a</sup>                                                                 | -0.38                  |

**Table 7.** Bond parameters for Distamycin. Atom names according to Figure 1B.

| Bond    | Force constant<br>$K_{b_n}$ ( $10^6$ kJmol $^{-1}$ nm $^{-4}$ ) | Ideal bond<br>length<br>$b_{0n}$ (nm) | Bond     | Force constant<br>$K_{b_n}$ ( $10^6$ kJmol $^{-1}$ nm $^{-4}$ ) | Ideal bond<br>length<br>$b_{0n}$ (nm) |
|---------|-----------------------------------------------------------------|---------------------------------------|----------|-----------------------------------------------------------------|---------------------------------------|
| N1-H11  | 18.7                                                            | 0.100                                 | C11-C12  | 11.8                                                            | 0.133                                 |
| N1-H12  | 18.7                                                            | 0.100                                 | C12-HA12 | 12.3                                                            | 0.109                                 |
| N2-H21  | 18.7                                                            | 0.100                                 | C12-C13  | 11.8                                                            | 0.133                                 |
| N2-H22  | 18.7                                                            | 0.100                                 | C13-C14  | 11.8                                                            | 0.133                                 |
| N1-C1   | 10.5                                                            | 0.134                                 | C14-HA14 | 12.3                                                            | 0.109                                 |
| N2-C1   | 10.5                                                            | 0.134                                 | C14-N6   | 11.8                                                            | 0.133                                 |
| C1-C2   | 7.15                                                            | 0.153                                 | N6-C15   | 5.73                                                            | 0.148                                 |
| C2-C3   | 7.15                                                            | 0.153                                 | N6-C11   | 11.8                                                            | 0.133                                 |
| C3-N3   | 8.71                                                            | 0.147                                 | C13-N7   | 8.71                                                            | 0.147                                 |
| N3-H3   | 18.7                                                            | 0.100                                 | N7-H7    | 18.7                                                            | 0.100                                 |
| N3-C4   | 11.8                                                            | 0.133                                 | N7-C16   | 11.8                                                            | 0.133                                 |
| C4-O1   | 16.6                                                            | 0.123                                 | C16-O3   | 16.6                                                            | 0.123                                 |
| C4-C5   | 7.15                                                            | 0.153                                 | C16-C17  | 7.15                                                            | 0.153                                 |
| C5-C6   | 11.8                                                            | 0.133                                 | C17-C18  | 11.8                                                            | 0.133                                 |
| C6-HA6  | 12.3                                                            | 0.109                                 | C18-HA18 | 12.3                                                            | 0.109                                 |
| C6-C7   | 11.8                                                            | 0.133                                 | C18-C19  | 11.8                                                            | 0.133                                 |
| C7-C8   | 11.8                                                            | 0.133                                 | C19-C20  | 11.8                                                            | 0.133                                 |
| C8-HA8  | 12.3                                                            | 0.109                                 | C20-HA20 | 12.3                                                            | 0.109                                 |
| C8-N4   | 11.8                                                            | 0.133                                 | C20-N8   | 11.8                                                            | 0.133                                 |
| N4-C9   | 5.73                                                            | 0.148                                 | N8-C21   | 5.73                                                            | 0.148                                 |
| N4-C5   | 11.8                                                            | 0.133                                 | N8-C17   | 11.8                                                            | 0.133                                 |
| C7-N5   | 8.71                                                            | 0.147                                 | C19-N9   | 8.71                                                            | 0.147                                 |
| N5-H5   | 18.7                                                            | 0.100                                 | N9-H9    | 18.7                                                            | 0.100                                 |
| N5-C10  | 11.8                                                            | 0.133                                 | N9-C22   | 11.8                                                            | 0.133                                 |
| C10-O2  | 16.6                                                            | 0.123                                 | C22-H22  | 12.3                                                            | 0.109                                 |
| C10-C11 | 7.15                                                            | 0.153                                 | C22-O4   | 16.6                                                            | 0.123                                 |



**Table 8.** Bond-angle parameters for Distamycin. Atom names according to Figure 1B.

| Bond angle  | Force constant<br>$K_{\theta_n}$ (kJmol <sup>-1</sup> ) | Ideal bond<br>angle<br>$\theta_{0_n}$ (degree) | Bond angle   | Force constant<br>$K_{\theta_n}$ (kJmol <sup>-1</sup> ) | Ideal bond<br>angle<br>$\theta_{0_n}$ (degree) |
|-------------|---------------------------------------------------------|------------------------------------------------|--------------|---------------------------------------------------------|------------------------------------------------|
| H11-N1-H12  | 445                                                     | 120.0                                          | N6-C11-C10   | 640                                                     | 126.0                                          |
| H21-N2-H22  | 445                                                     | 120.0                                          | C11-C12-HA12 | 575                                                     | 126.0                                          |
| C1-N1-H11   | 390                                                     | 120.0                                          | HA12-C12-C13 | 575                                                     | 126.0                                          |
| C1-N1-H12   | 390                                                     | 120.0                                          | C11-C12-C13  | 465                                                     | 108.0                                          |
| C1-N2-H21   | 390                                                     | 120.0                                          | C12-C13-C14  | 465                                                     | 108.0                                          |
| C1-N2-H22   | 390                                                     | 120.0                                          | C13-C14-HA14 | 575                                                     | 126.0                                          |
| N1-C1-N2    | 670                                                     | 120.0                                          | HA14-C14-N6  | 575                                                     | 126.0                                          |
| N1-C1-C2    | 670                                                     | 120.0                                          | C13-C14-N6   | 465                                                     | 108.0                                          |
| N2-C1-C2    | 670                                                     | 120.0                                          | C14-N6-C15   | 640                                                     | 126.0                                          |
| C1-C2-C3    | 530                                                     | 111.0                                          | C15-N6-C11   | 640                                                     | 126.0                                          |
| C2-C3-N3    | 530                                                     | 111.0                                          | C14-N6-C11   | 465                                                     | 108.0                                          |
| C3-N3-H3    | 460                                                     | 115.0                                          | C12-C13-N7   | 640                                                     | 126.0                                          |
| H3-N3-C4    | 415                                                     | 123.0                                          | C14-C13-N7   | 640                                                     | 126.0                                          |
| C3-N3-C4    | 700                                                     | 122.0                                          | C13-N7-H7    | 460                                                     | 115.0                                          |
| N3-C4-O1    | 730                                                     | 124.0                                          | H7-N7-C16    | 415                                                     | 123.0                                          |
| O1-C4-C5    | 685                                                     | 121.0                                          | C13-N7-C16   | 700                                                     | 122.0                                          |
| N3-C4-C5    | 610                                                     | 115.0                                          | N7-C16-O3    | 730                                                     | 124.0                                          |
| C4-C5-C6    | 640                                                     | 126.0                                          | O3-C16-C17   | 685                                                     | 121.1                                          |
| C6-C5-N4    | 465                                                     | 108.0                                          | N7-C16-C17   | 610                                                     | 115.0                                          |
| N4-C5-C4    | 640                                                     | 126.0                                          | C16-C17-C18  | 640                                                     | 126.0                                          |
| C5-C6-HA6   | 575                                                     | 126.0                                          | C18-C17-N8   | 465                                                     | 108.0                                          |
| C5-C6-C7    | 465                                                     | 108.0                                          | N8-C17-C16   | 640                                                     | 126.0                                          |
| HA6-C6-C7   | 575                                                     | 126.0                                          | C17-C18-HA18 | 575                                                     | 126.0                                          |
| C6-C7-C8    | 465                                                     | 108.0                                          | HA18-C18-C19 | 575                                                     | 126.0                                          |
| C6-C7-N5    | 640                                                     | 126.0                                          | C17-C18-C19  | 465                                                     | 108.0                                          |
| C8-C7-N5    | 640                                                     | 126.0                                          | C19-C20-HA20 | 575                                                     | 126.0                                          |
| C7-C8-HA8   | 575                                                     | 126.0                                          | HA20-C20-N8  | 575                                                     | 126.0                                          |
| HA8-C8-N4   | 575                                                     | 126.0                                          | C19-C20-N8   | 465                                                     | 108.0                                          |
| C7-C8-N4    | 465                                                     | 108.0                                          | C20-N8-C21   | 640                                                     | 126.0                                          |
| C8-N4-C9    | 640                                                     | 126.0                                          | C21-N8-C17   | 640                                                     | 126.0                                          |
| C9-N4-C5    | 640                                                     | 126.0                                          | C20-N8-C17   | 465                                                     | 108.0                                          |
| C8-N4-C5    | 465                                                     | 108.0                                          | C18-C19-N9   | 640                                                     | 126.0                                          |
| C7-N5-H5    | 460                                                     | 115.0                                          | C20-C19-N9   | 640                                                     | 126.0                                          |
| H5-N5-C10   | 415                                                     | 123.0                                          | C18-C19-C20  | 465                                                     | 108.0                                          |
| C7-N5-C10   | 700                                                     | 122.0                                          | C19-N9-H9    | 460                                                     | 115.0                                          |
| N5-C10-O2   | 730                                                     | 124.0                                          | H9-N9-C22    | 415                                                     | 123.0                                          |
| O2-C10-C11  | 685                                                     | 121.0                                          | C19-N9-C22   | 700                                                     | 122.0                                          |
| N5-C10-C11  | 610                                                     | 115.0                                          | N9-C22-H22   | 610                                                     | 115.0                                          |
| C10-C11-C12 | 640                                                     | 126.0                                          | N9-C22-O4    | 730                                                     | 124.0                                          |
| N6-C11-C12  | 465                                                     | 108.0                                          | O4-C22-H22   | 685                                                     | 121.0                                          |

**Table 9.** Improper dihedral-angle parameters for Distamycin. Atom names according to Figure 1B.

| Improper dihedral angle | Force constant<br>$K_{\xi_n}$<br>(kJmol <sup>-1</sup> degree <sup>-2</sup> ) | Ideal improper<br>dihedral angle<br>$\xi_0$ (degree) |
|-------------------------|------------------------------------------------------------------------------|------------------------------------------------------|
| N1-H11-H12-C1           | 0.0510                                                                       | 0.0                                                  |
| N2-H21-H22-C1           | 0.0510                                                                       | 0.0                                                  |
| C1-N1-N2-C2             | 0.0510                                                                       | 0.0                                                  |
| N3-C3-H3-C4             | 0.0510                                                                       | 0.0                                                  |
| C4-N3-O1-C5             | 0.0510                                                                       | 0.0                                                  |
| C5-C4-C6-N4             | 0.0510                                                                       | 0.0                                                  |
| C6-C5-HA6-C7            | 0.0510                                                                       | 0.0                                                  |
| C7-C6-C8-N5             | 0.0510                                                                       | 0.0                                                  |
| C8-C7-HA8-N4            | 0.0510                                                                       | 0.0                                                  |
| N4-C5-C8-C9             | 0.0510                                                                       | 0.0                                                  |
| C5-C6-C7-C8             | 0.0510                                                                       | 0.0                                                  |
| C6-C7-C8-N4             | 0.0510                                                                       | 0.0                                                  |
| C7-C8-N4-C5             | 0.0510                                                                       | 0.0                                                  |
| C8-N4-C5-C6             | 0.0510                                                                       | 0.0                                                  |
| N4-C5-C6-C7             | 0.0510                                                                       | 0.0                                                  |
| N5-C7-H5-C10            | 0.0510                                                                       | 0.0                                                  |
| C10-N5-O2-C11           | 0.0510                                                                       | 0.0                                                  |
| C11-C10-C12-N6          | 0.0510                                                                       | 0.0                                                  |
| C12-C11-HA12-C13        | 0.0510                                                                       | 0.0                                                  |
| C13-C12-C14-N7          | 0.0510                                                                       | 0.0                                                  |
| C14-C13-HA14-N6         | 0.0510                                                                       | 0.0                                                  |
| N6-C11-C14-C15          | 0.0510                                                                       | 0.0                                                  |
| C11-C12-C13-C14         | 0.0510                                                                       | 0.0                                                  |
| C12-C13-C14-N6          | 0.0510                                                                       | 0.0                                                  |
| C13-C14-N6-C11          | 0.0510                                                                       | 0.0                                                  |
| C14-N6-C11-C12          | 0.0510                                                                       | 0.0                                                  |
| N6-C11-C12-C13          | 0.0510                                                                       | 0.0                                                  |
| N7-C13-H7-C16           | 0.0510                                                                       | 0.0                                                  |
| C16-N7-O3-C17           | 0.0510                                                                       | 0.0                                                  |
| C17-C16-C18-N8          | 0.0510                                                                       | 0.0                                                  |
| C18-C17-HA18-C19        | 0.0510                                                                       | 0.0                                                  |
| C19-C18-C20-N9          | 0.0510                                                                       | 0.0                                                  |
| C20-C19-HA20-N8         | 0.0510                                                                       | 0.0                                                  |
| N8-C17-C20-C21          | 0.0510                                                                       | 0.0                                                  |
| C17-C18-C19-C20         | 0.0510                                                                       | 0.0                                                  |
| C18-C19-C20-N8          | 0.0510                                                                       | 0.0                                                  |
| C19-C20-N8-C17          | 0.0510                                                                       | 0.0                                                  |
| C20-N8-C17-C18          | 0.0510                                                                       | 0.0                                                  |
| N8-C17-C18-C19          | 0.0510                                                                       | 0.0                                                  |
| N9-C19-H9-C22           | 0.0510                                                                       | 0.0                                                  |
| C22-N9-O4-H22           | 0.0510                                                                       | 0.0                                                  |

**Table 10.** Dihedral-angle parameters for Distamycin. Atom names according to Figure 1B.

| Dihedral angle | Force constant<br>$K_{\varphi_n}$ (kJmol <sup>-1</sup> ) | Phase shift<br>$\cos(\delta_n)$ | Multiplicity<br>$m_n$ |
|----------------|----------------------------------------------------------|---------------------------------|-----------------------|
| H11-N1-C1-C2   | 33.5                                                     | -1.0                            | 2                     |
| H21-N2-C1-C2   | 33.5                                                     | -1.0                            | 2                     |
| N1-C1-C2-C3    | 1.0                                                      | +1.0                            | 6                     |
| C1-C2-C3-N3    | 5.92                                                     | +1.0                            | 3                     |
| C2-C3-N3-C4    | 1.0                                                      | -1.0                            | 6                     |
| C3-N3-C4-C5    | 33.5                                                     | -1.0                            | 2                     |
| N3-C4-C5-C6    | 33.5                                                     | -1.0                            | 2                     |
| C6-C7-N5-C10   | 33.5                                                     | -1.0                            | 2                     |
| C7-N5-C10-C11  | 33.5                                                     | -1.0                            | 2                     |
| N5-C10-C11-C12 | 33.5                                                     | -1.0                            | 2                     |
| C12-C13-N7-C16 | 33.5                                                     | -1.0                            | 2                     |
| C13-N7-C16-C17 | 33.5                                                     | -1.0                            | 2                     |
| N7-C16-C17-C18 | 33.5                                                     | -1.0                            | 2                     |
| C18-C19-N9-C22 | 33.5                                                     | -1.0                            | 2                     |
| C19-N9-C22-H22 | 33.5                                                     | -1.0                            | 2                     |
